# Supplementary material for: Transcriptional regulation of cyclophilin D by BMP/Smad signaling and its role in osteogenic differentiation
Source: eLife journal article supplement (doi:10.7554/elife.75023), 2022-05-30
Supplement: supp [file elife-75023-supp-v1.zip]

| <i>Ppif</i><br>manipulation  | Bone Maintenance                                                                  |                                                                                                        | Bone Frx Repair                                                                   |      |
|------------------------------|-----------------------------------------------------------------------------------|--------------------------------------------------------------------------------------------------------|-----------------------------------------------------------------------------------|------|
|                              | Young                                                                             | Aged                                                                                                   | Young                                                                             | Aged |
| Global KO <sup>1,2</sup>     |  |                       |  |      |
| NIM811 systemic <sup>2</sup> |                                                                                   |                                                                                                        |  |      |
| Prx1-Cre cKO <sup>2</sup>    |  |                                                                                                        |  |      |
| Col1-Cre cKO <sup>3</sup>    |  |                       |                                                                                   |      |
| Cre-DIO GOF                  |                                                                                   |  * <i>Ppif</i> rescue |                                                                                   |      |

<sup>1</sup> Shum et al; PLoS One, 2016; <sup>2</sup> Shares et al; Bone 2020;

<sup>3</sup> Current paper

 No effect  
 Positive effect  
 Negative effect
