# Supplementary material for: Transcriptional regulation of cyclophilin D by BMP/Smad signaling and its role in osteogenic differentiation
Source: eLife journal article supplement (doi:10.7554/elife.75023), 2022-05-30

A

| Aged (24 Mo) vs Young (2 Mo) |                   |         |          |
|------------------------------|-------------------|---------|----------|
| Gene ID                      | Log (fold change) | P value | Adjusted |
| <i>Bmp2</i>                  | -3.76260          | 0.16975 | 0.47670  |
| <i>Smad1</i>                 | -3.49604          | 0.23452 | 0.47670  |
| <i>Ppif</i>                  | 27.70213          | 0.01365 | 0.24294  |

(5) Ambrosi et al; Nature, 2021

| Osteoarthritis vs Normal |             |          |          |
|--------------------------|-------------|----------|----------|
| Gene ID                  | Fold change | P value  | Adjusted |
| <i>BMP2K</i>             | 1.62836     | 5.82E-07 | 0.00002  |
| <i>PPIF</i>              | -1.57291    | 0.01161  | 0.06728  |

(23) Dunn et al; OA and Cartilage, 2016

| Frx (day 14) vs UnFrx |                                |             |          |
|-----------------------|--------------------------------|-------------|----------|
| Gene ID               | Log <sub>2</sub> (fold change) | Fold Change | Adjusted |
| <i>Bmp2 (d1)</i>      | 2.00399                        | 4.01108     | 8.40E-59 |
| <i>Smad1</i>          | 1.01311                        | 2.01826     | 6.85E-36 |
| <i>Ppif</i>           | -1.17983                       | 0.44140     | 1.74E-36 |

(19) Coates et al; Bone, 2019

| Valve Calcification |                         |                       |
|---------------------|-------------------------|-----------------------|
| Gene ID             | Mean fpkm               |                       |
|                     | Valve calcificant cells | Non-calcificant cells |
| <i>BMP2</i>         | 3.44                    | 2.02                  |
| <i>PPIF</i>         | 8.55                    | 12.51                 |

(36) Huang et al; Stem Cells Int, 2019

B

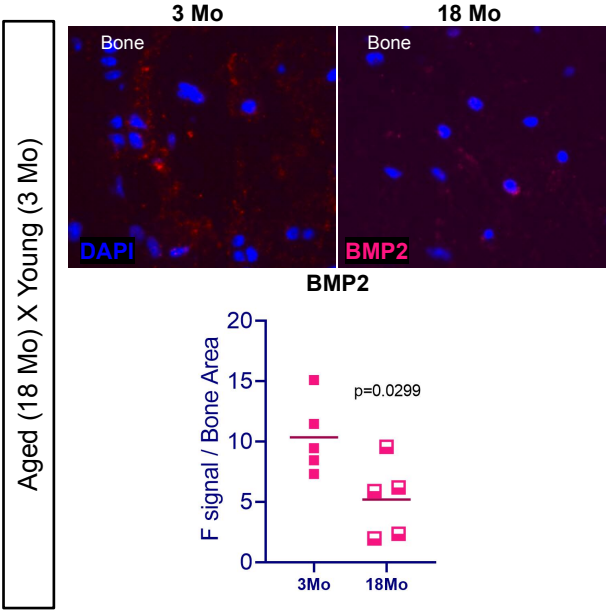

C

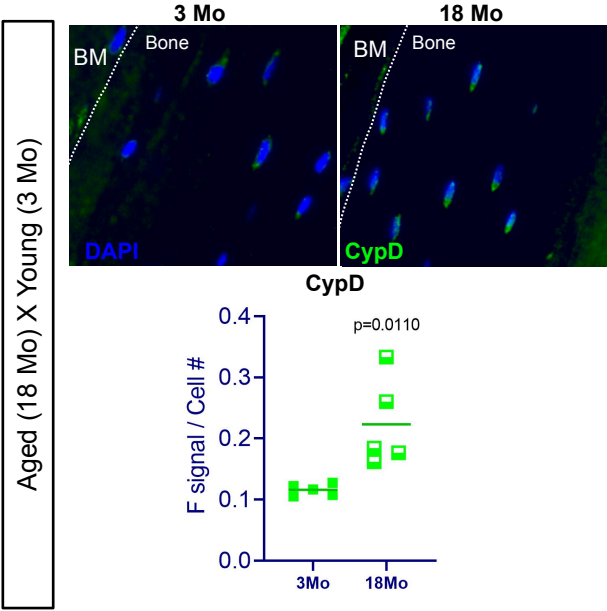

D

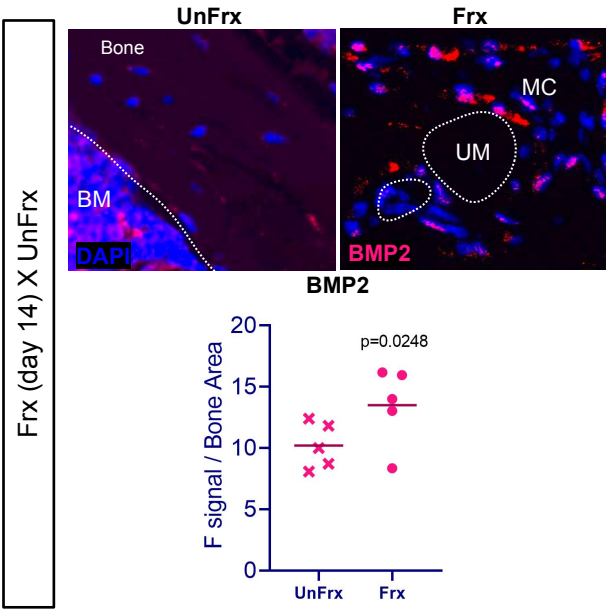

E

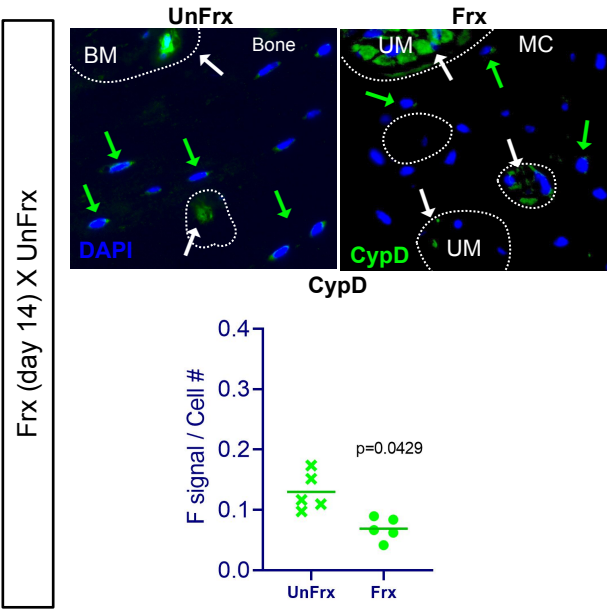

Supplement: supp [file elife-75023-supp-v1.zip]
