# Supplementary figures and images for: Transcriptional regulation of cyclophilin D by BMP/Smad signaling and its role in osteogenic differentiation
Source: eLife journal article supplement (doi:10.7554/elife.75023), 2022-05-30

Bio-Plex 2019-12-10 14hr 10min

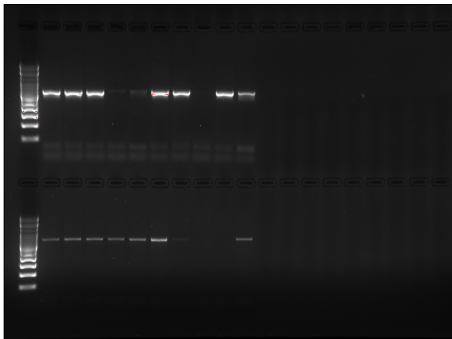

Supplement: fig6-figsupp1-data3 [file elife-75023-fig6-figsupp1-data3-v2.zip]

Bio-Plex 2019-12-10 14hr 10min

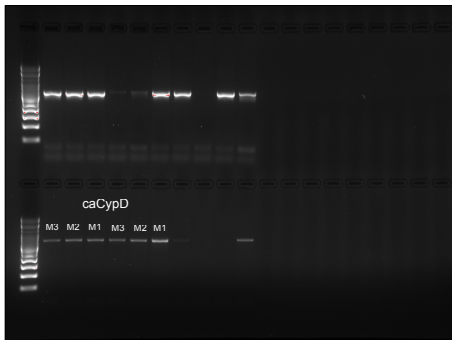

Supplement: fig6-figsupp1-data4 [file elife-75023-fig6-figsupp1-data4-v2.zip]

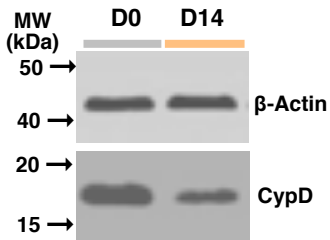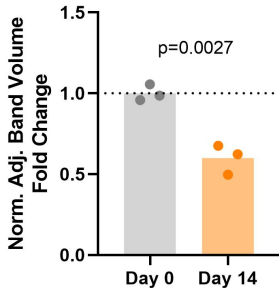

Supplement: supp [file elife-75023-supp-v1.zip]

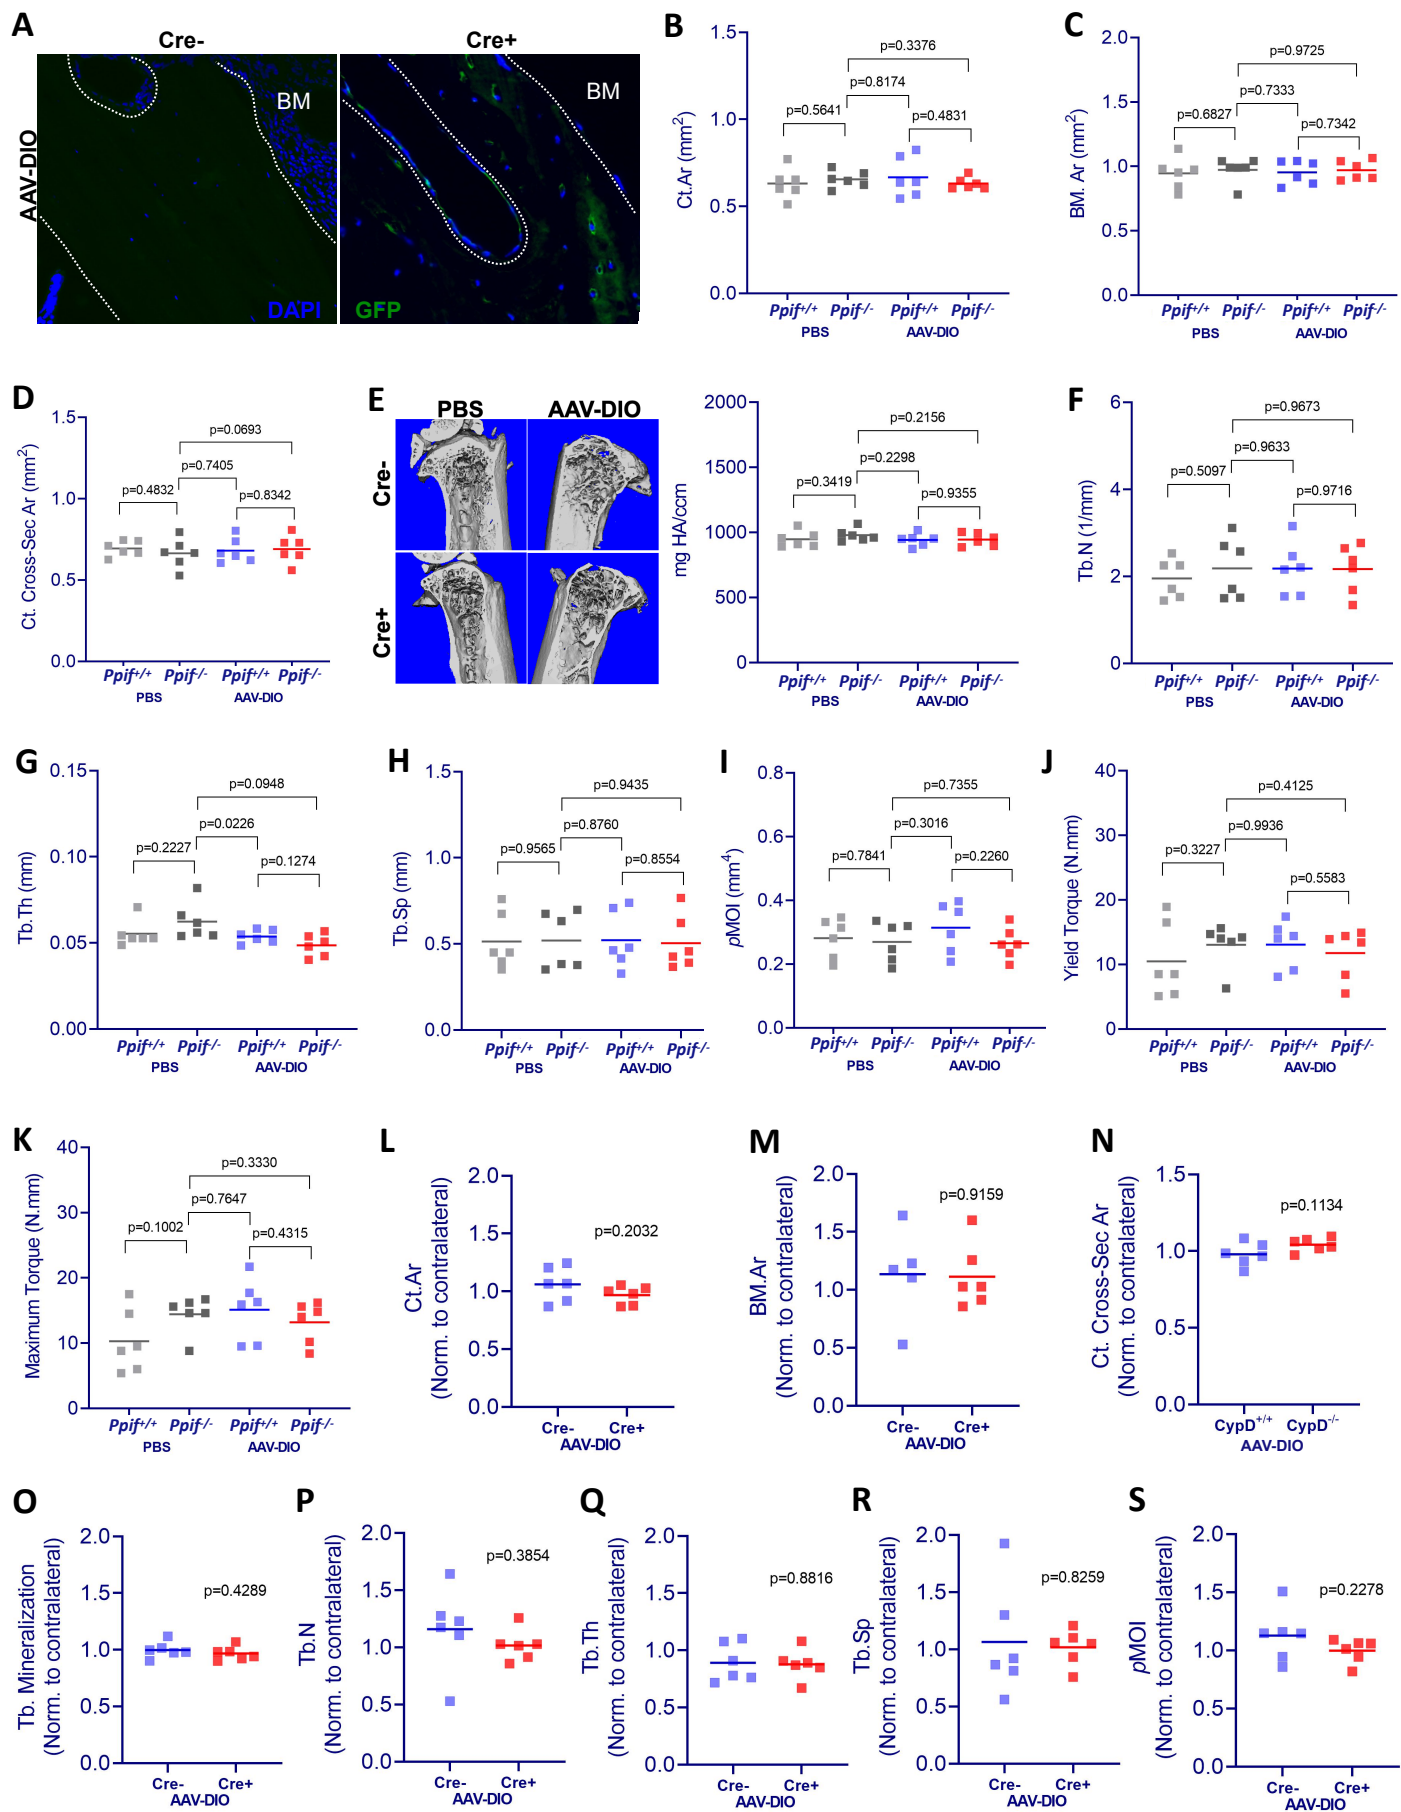

Supplement: supp [file elife-75023-supp-v1.zip]

**A**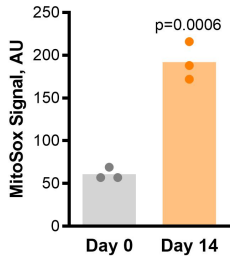**B**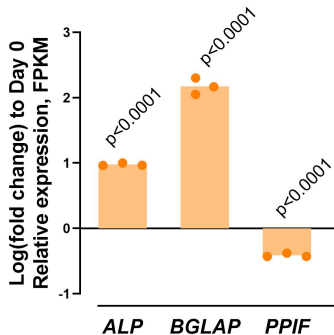

Supplement: supp [file elife-75023-supp-v1.zip]

**A**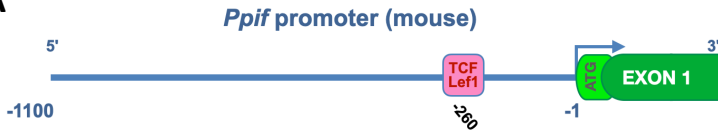**B**

-1.1kb Luc Reporter + Wnt3a

-1107 -101

TCF Lef1

ST2 - stromal cells

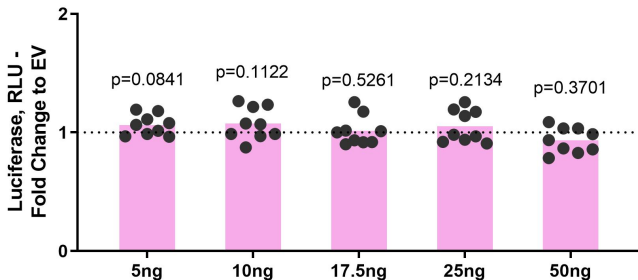

Supplement: supp [file elife-75023-supp-v1.zip]

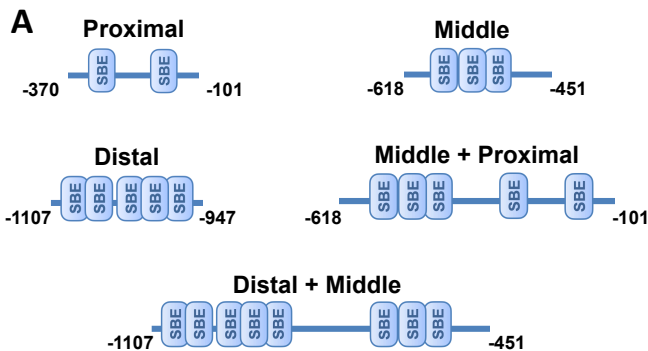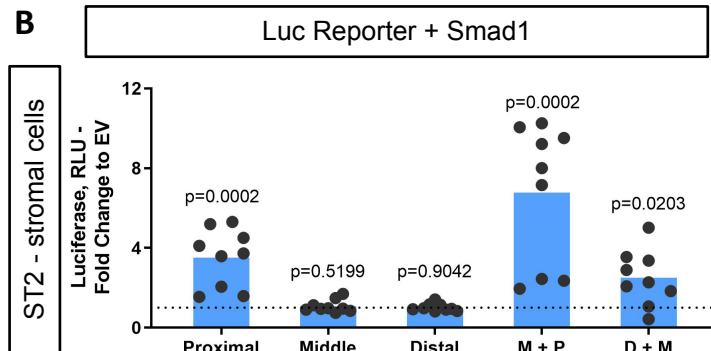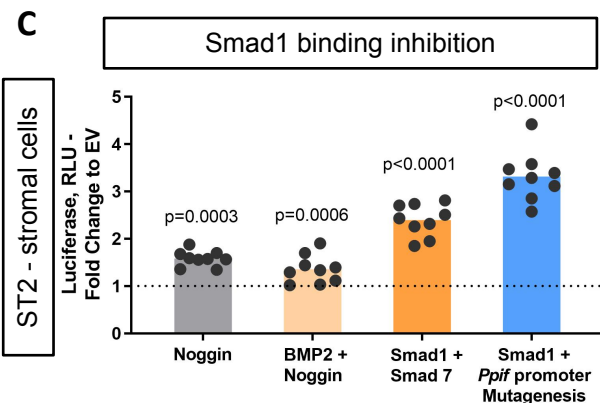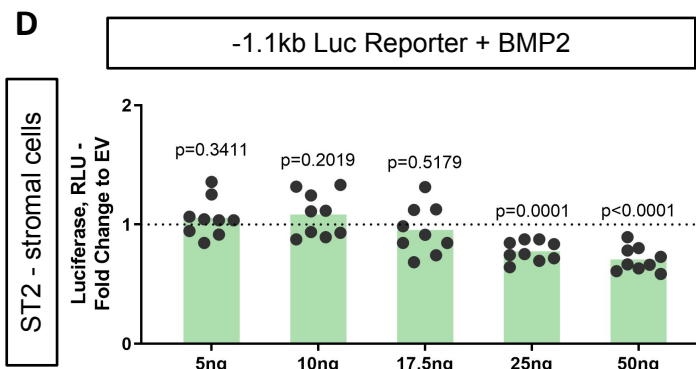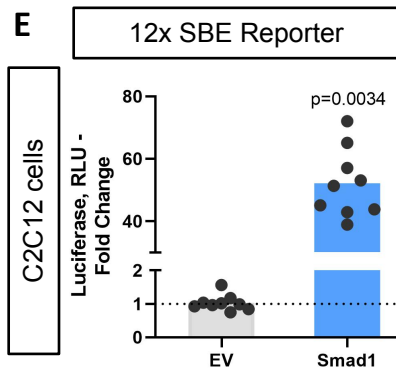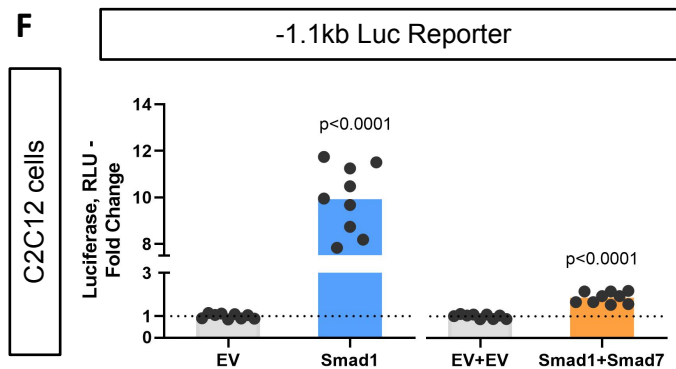

Supplement: supp [file elife-75023-supp-v1.zip]
